# Supplementary material for: Molecular basis for Gβγ-mediated activation of phosphoinositide 3-kinase γ
Source: PubMed Central journal article supplement — bioRxiv. 2023 May 5:2023.05.04.539492. Preprint. [Version 1] doi: 10.1101/2023.05.04.539492 (PMC10187307; doi:10.1101/2023.05.04.539492), 2023-05-05
Supplement: media-3.pdf [file media-3.pdf]

# Molecular basis for G $\beta$ $\gamma$ -mediated activation of phosphoinositide 3-kinase $\gamma$

Chun-Liang Chen<sup>1</sup>, Ramizah Syahirah<sup>3</sup>, Sandeep K. Ravala<sup>1</sup>, Yu-Chen Yen<sup>1</sup>, Thomas Klose<sup>2</sup>, Qing Deng<sup>3,4,5</sup>, and John J. G. Tesmer<sup>1\*</sup>

## Affiliations:

1. Departments of Biological Sciences & Medicinal Chemistry and Molecular Pharmacology, Purdue University. 240 S. Martin Jischke Drive, West Lafayette, IN 47907
2. Purdue Cryo-EM Facility, Purdue University. 240 S. Martin Jischke Drive, West Lafayette, IN 47907
3. Department of Biological Sciences, Purdue University. 915 W State St, West Lafayette, IN 47907
4. Purdue Institute for Inflammation, Immunology & Infectious Disease, Purdue University, West Lafayette, IN 47907, USA
5. Purdue University Center for Cancer Research, Purdue University, West Lafayette, IN 47907, USA

\*Corresponding author

## Extended Data includes:

Extended Data Figs 1-15

Extended Data Tables 1-3

Extended Data Movies 1-2

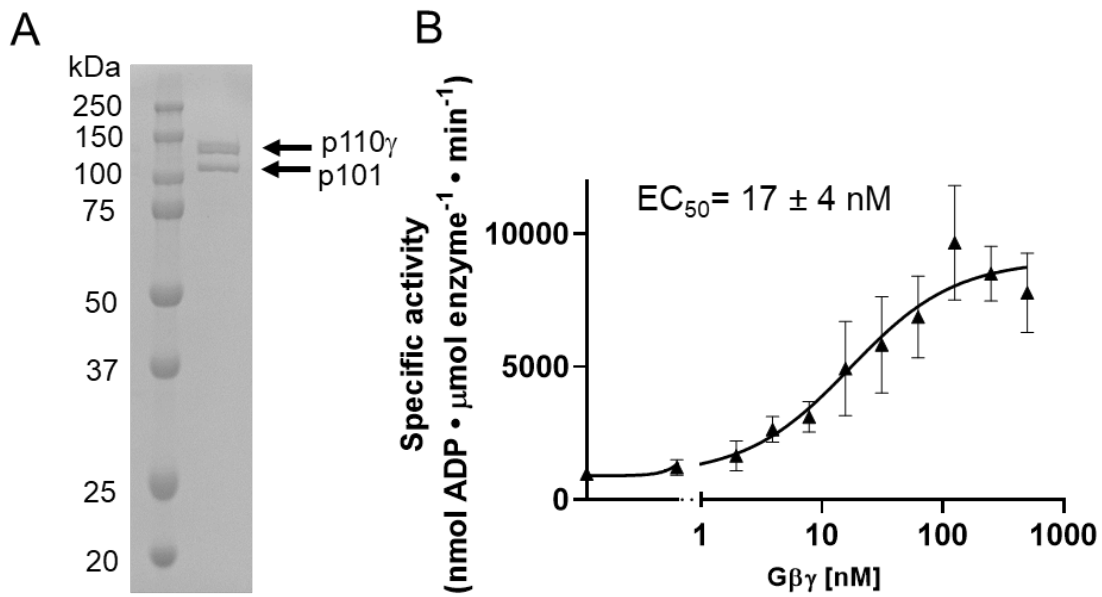

**Extended Data Figure 1. Purification of functional PI3K $\gamma$**  (A) SDS-PAGE analysis of PI3K $\gamma$ . The protein was purified via anti-FLAG affinity pull-down and eluted from the beads with 3X-FLAG peptides at a final concentration of 20  $\mu$ M. (B) Activation of PI3K $\gamma$  by G $\beta\gamma$ . PI3K $\gamma$  activity measured at varying concentrations of G $\beta\gamma$  ([G $\beta\gamma$ ]) from 0 to 500 nM. [n=8; error bars represent SD] (see Extended Data Table 3).

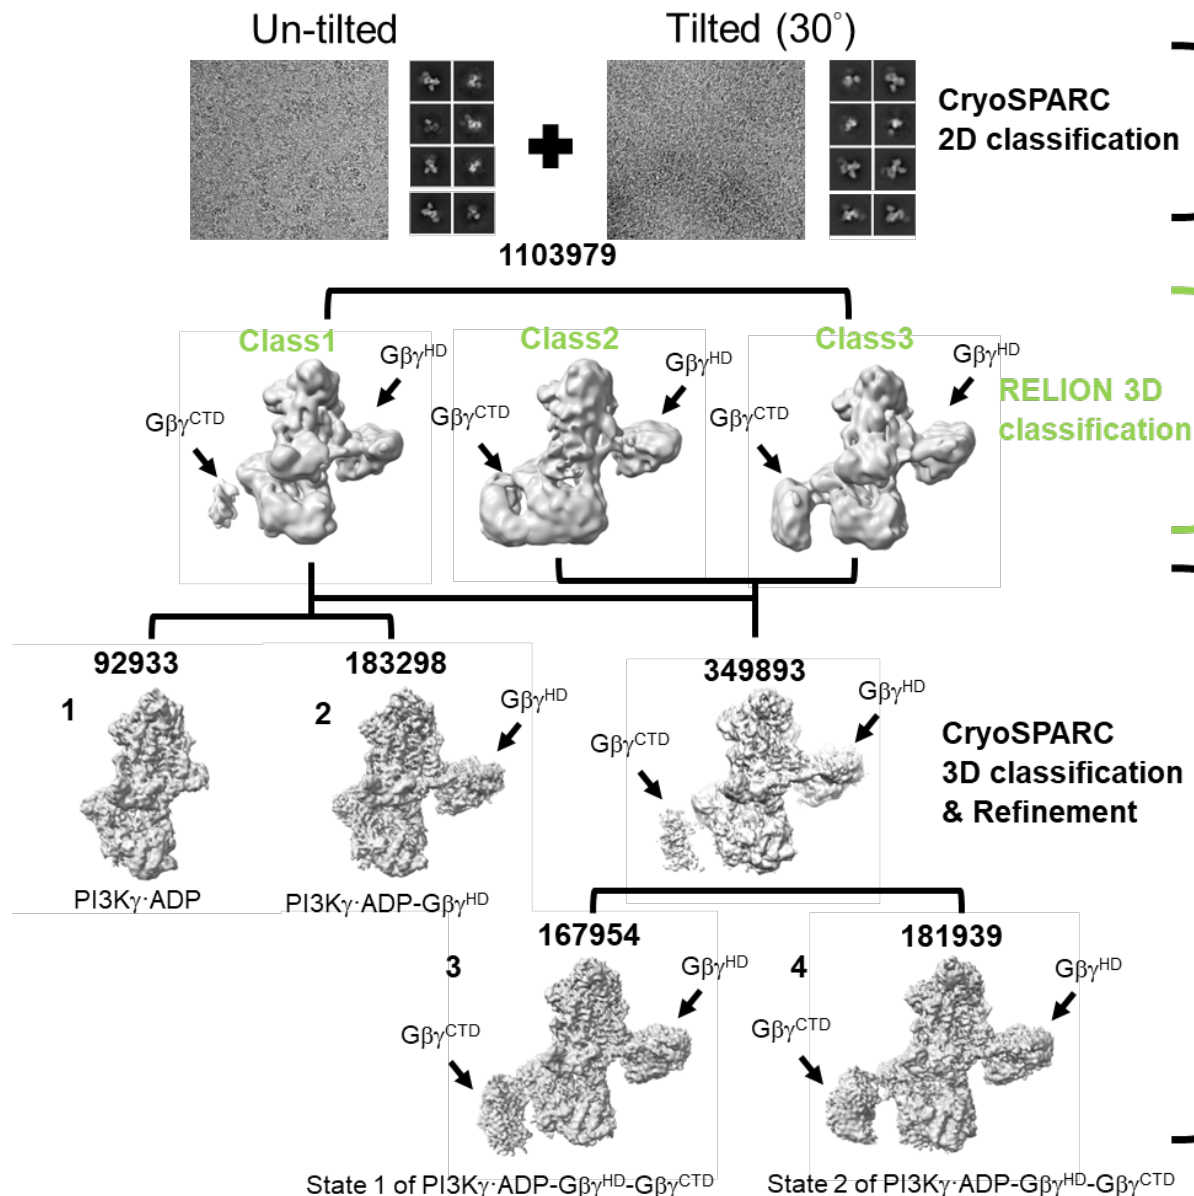

**Extended Data Figure 2. Cryo-EM data processing of PI3K $\gamma$  complexed with G $\beta\gamma$  and ADP.** The untilted (3525 frames) and 30° tilted datasets (2943 frames) were collected and combined for data processing in CryoSPARC, resulting in ~1103979 particles for further classification in RELION 3D classification using 3 classes. Particles in Class1 showing weaker G $\beta\gamma^{CTD}$  density were further processed via CryoSPARC 3D classification. Most particles without the G $\beta\gamma^{CTD}$  density classified into two species: PI3K $\gamma$ ·ADP and PI3K $\gamma$ ·ADP-G $\beta\gamma^{HD}$ . The remaining particles containing the G $\beta\gamma^{CTD}$  were combined with particles from RELION Classes 2 & 3, containing both G $\beta\gamma^{CTD}$  and G $\beta\gamma^{HD}$ , for 3D classification in CryoSPARC, resulting in two distinct conformations of PI3K $\gamma$ ·ADP-G $\beta\gamma^{HD}$ -G $\beta\gamma^{CTD}$ , State1 and State2, where in G $\beta\gamma^{CTD}$  and the p101 CTD to which it binds exhibiting the largest variation..

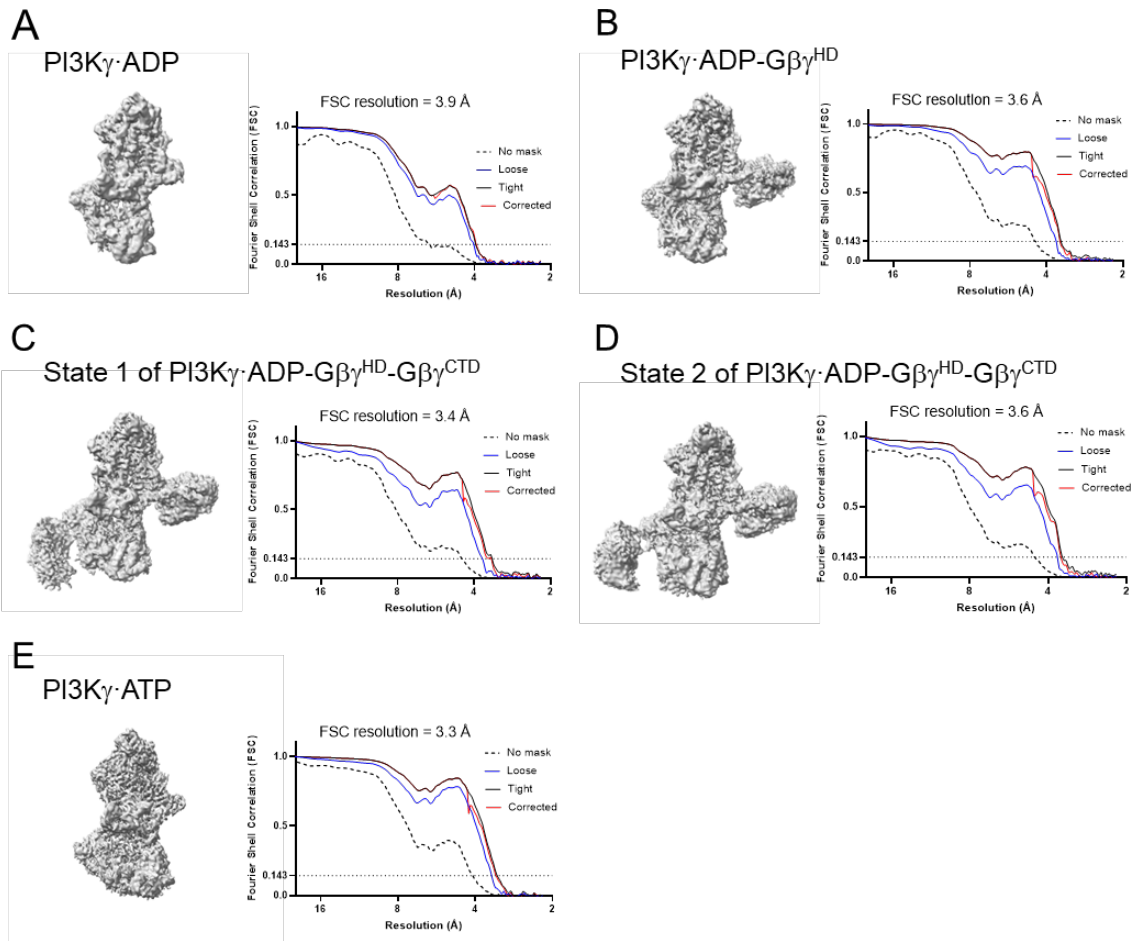

**Extended Data Figure 3. Resolution estimation for cryo-EM reconstructions. (A)** PI3K $\gamma$ ·ADP: 3.9 Å **(B)** PI3K $\gamma$ ·ADP-G $\beta\gamma$ <sup>HD</sup>: 3.6 Å **(C)** State 1 of PI3K $\gamma$ ·ADP-G $\beta\gamma$ <sup>HD</sup>-G $\beta\gamma$ <sup>CTD</sup>: 3.4 Å **(D)** State 2 of PI3K $\gamma$ ·ADP-G $\beta\gamma$ <sup>HD</sup>-G $\beta\gamma$ <sup>CTD</sup>: 3.6 Å **(E)** PI3K $\gamma$ ·ATP: 3.3 Å. FSC, Fourier shell correlation.

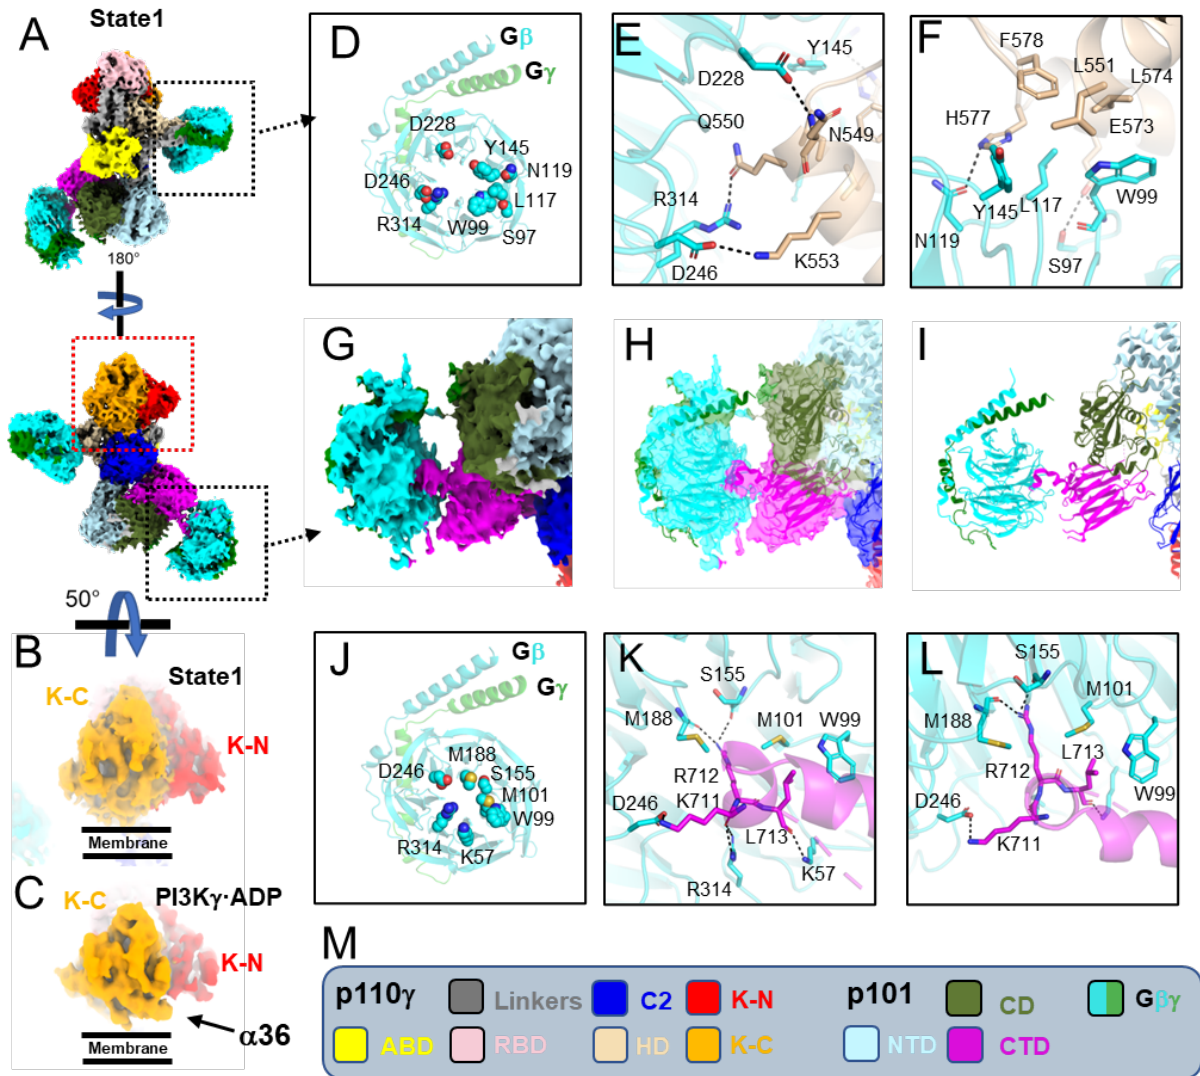

**Extended Data Figure 4. Cryo-EM reconstruction of PI3K $\gamma$ ·ADP-G $\beta$  $\gamma$ <sup>HD</sup>-G $\beta$  $\gamma$ <sup>CTD</sup> in State1. (A)** Cryo-EM map of State1 with domain colored and indicated in (M). **(B)** Close-up of the kinase domain in State1 with no observable density for  $\alpha$ 36. **(C)** Kinase domain in PI3K $\gamma$ ·ADP, with  $\alpha$ 36 indicated. **(D)** G $\beta$  $\gamma$  residues involved in the p110 $\gamma$  HD interaction. **(E-F)** Residues in the G $\beta$  $\gamma$ -HD interface. Residues are shown as sticks and colored according to atom type. **(G-I)** Cryo-EM map and model fitting for the p101 CTD-G $\beta$  $\gamma$ <sup>CTD</sup> interaction. **(J)** G $\beta$  $\gamma$  residues involved in the p110 $\gamma$  CTD interaction. **(K-L)** Residues in the G $\beta$  $\gamma$ -CTD interface. **(M)** Color key for domains in p110 $\gamma$ , p101, and G $\beta$  $\gamma$ .

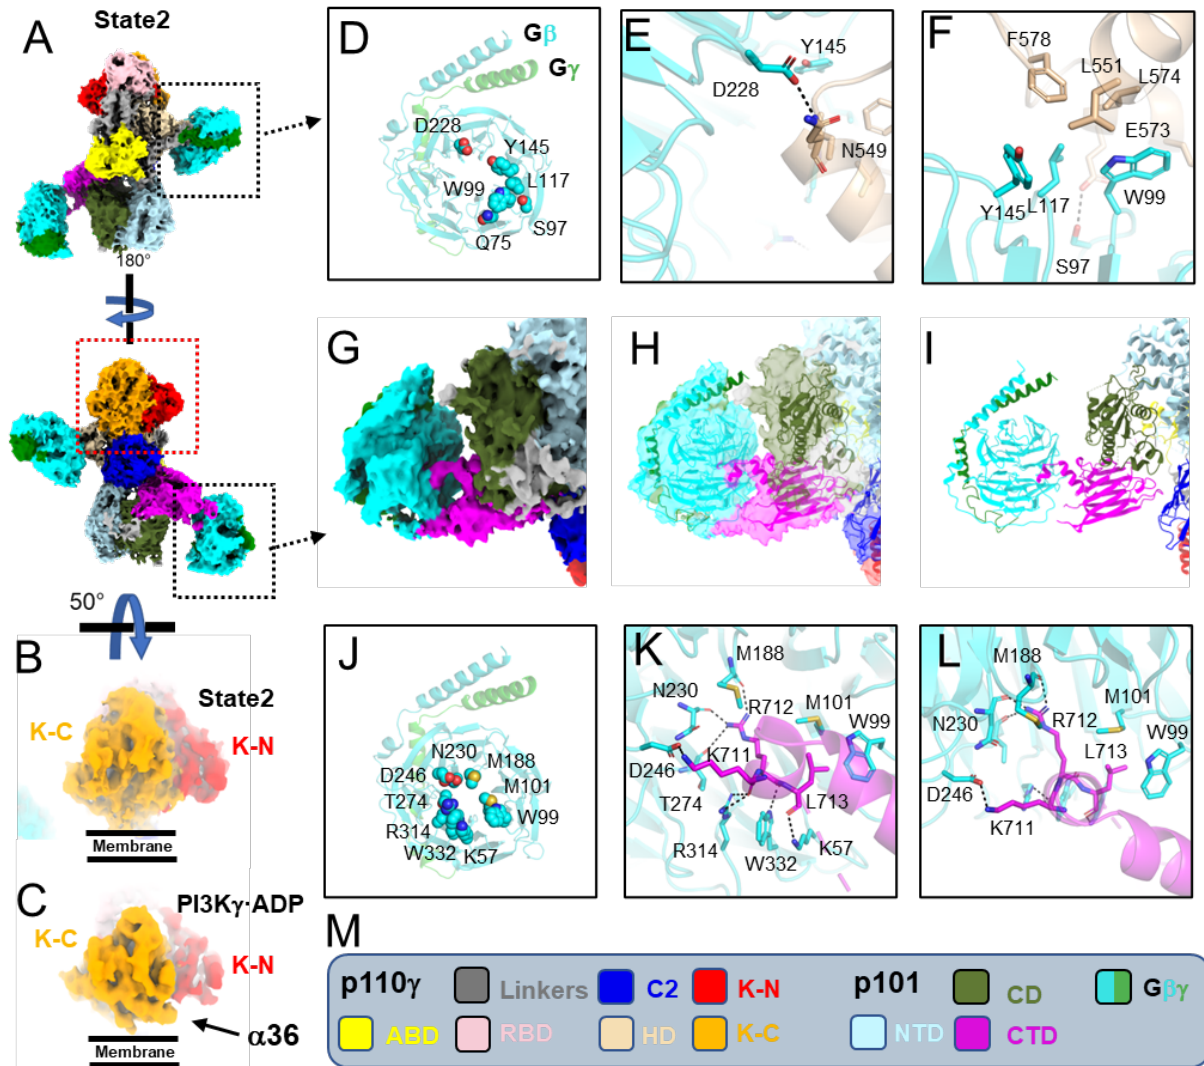

**Extended Data Figure 5. Cryo-EM reconstruction of PI3K $\gamma$ ·ADP-G $\beta$  $\gamma$ <sup>HD</sup>-G $\beta$  $\gamma$ <sup>CTD</sup> in State2. (A)** Cryo-EM map of State1 with domain colored and indicated in (M). **(B)** Close-up of the kinase domain in State2 with no observable density for  $\alpha$ 36. **(C)** Kinase domain in PI3K $\gamma$ ·ADP, with  $\alpha$ 36 indicated. **(D)** G $\beta$  $\gamma$  residues involved in the p110 $\gamma$  HD interaction. **(E-F)** Residues in the G $\beta$  $\gamma$ -HD interface. Residues are shown as sticks and colored according to atom type. **(G-I)** Cryo-EM map and model fitting for the p101 CTD-G $\beta$  $\gamma$ <sup>CTD</sup> interaction. **(J)** G $\beta$  $\gamma$  residues involved in the p110 $\gamma$  CTD interaction. **(K-L)** Residues in the G $\beta$  $\gamma$ -CTD interface. **(M)** Color key for domains in p110 $\gamma$ , p101, and G $\beta$  $\gamma$ .

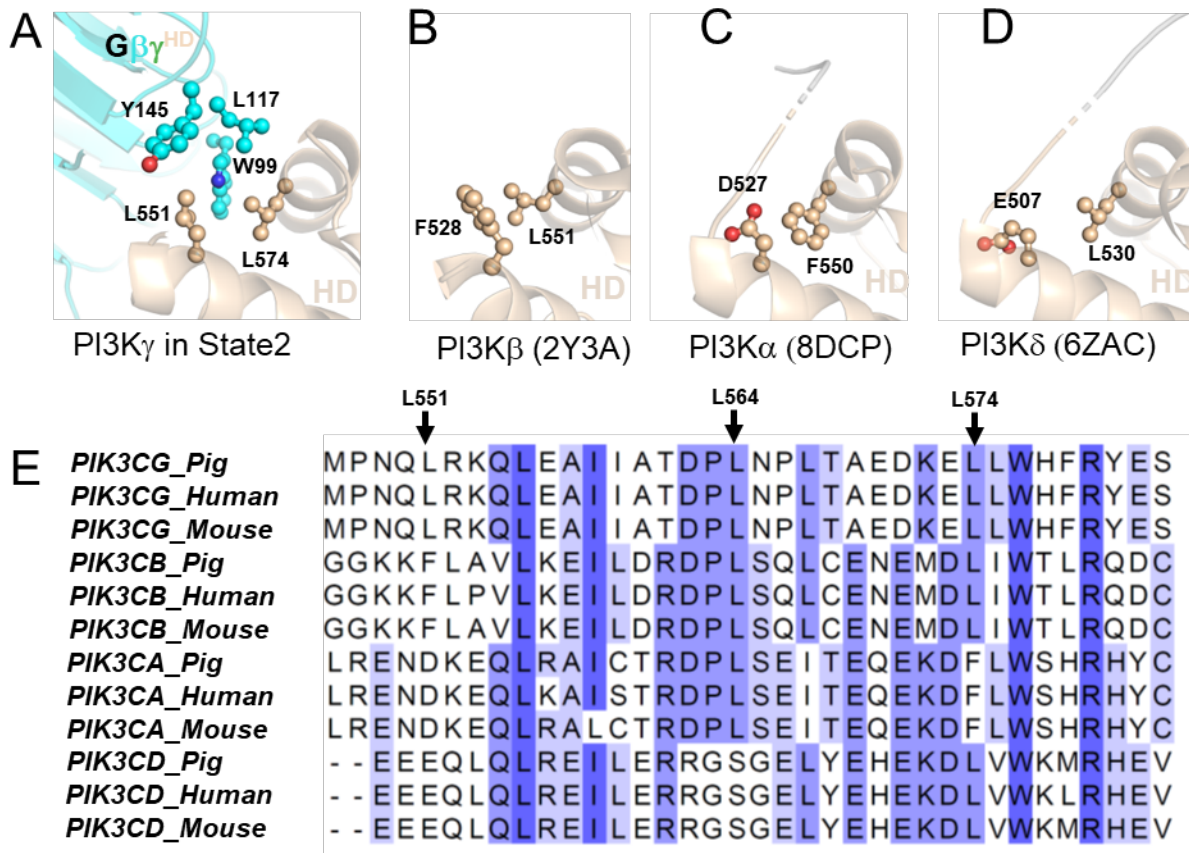

**Extended Data Figure 6. Comparison of PI3K isoforms at the  $G\beta\gamma^{HD}$  binding site of PI3K $\gamma$ .** Only PI3K $\beta$  retains a hydrophobic signature that may be responsive to  $G\beta\gamma$ . **(A)** Hydrophobic interactions between  $G\beta\gamma^{HD}$  and p110 $\gamma$  HD. Residues. **(B-D)** Residues of PI3K $\beta$  (PDB entry 2Y3A), PI3K $\alpha$  (PDB entry 8DCP), and PI3K $\delta$  (PDB entry 6ZAC) at positions corresponding to Leu551 and Leu574 in PI3K $\gamma$  are shown as stick models. **(E)** Sequence alignment of p110 $\gamma$ (PIK3CG),  $\beta$ (PIK3CB),  $\alpha$ (PIK3CA), and  $\delta$ (PIK3CD) isoforms (note that human, pig, and mouse sequences are identical within each isoform in this region). The sequence alignment was performed using ClustalW and colored according to BLOSUM-62. Interfacial residues Leu551, Leu564, and Leu574 from pig p110 $\gamma$  are indicated above.

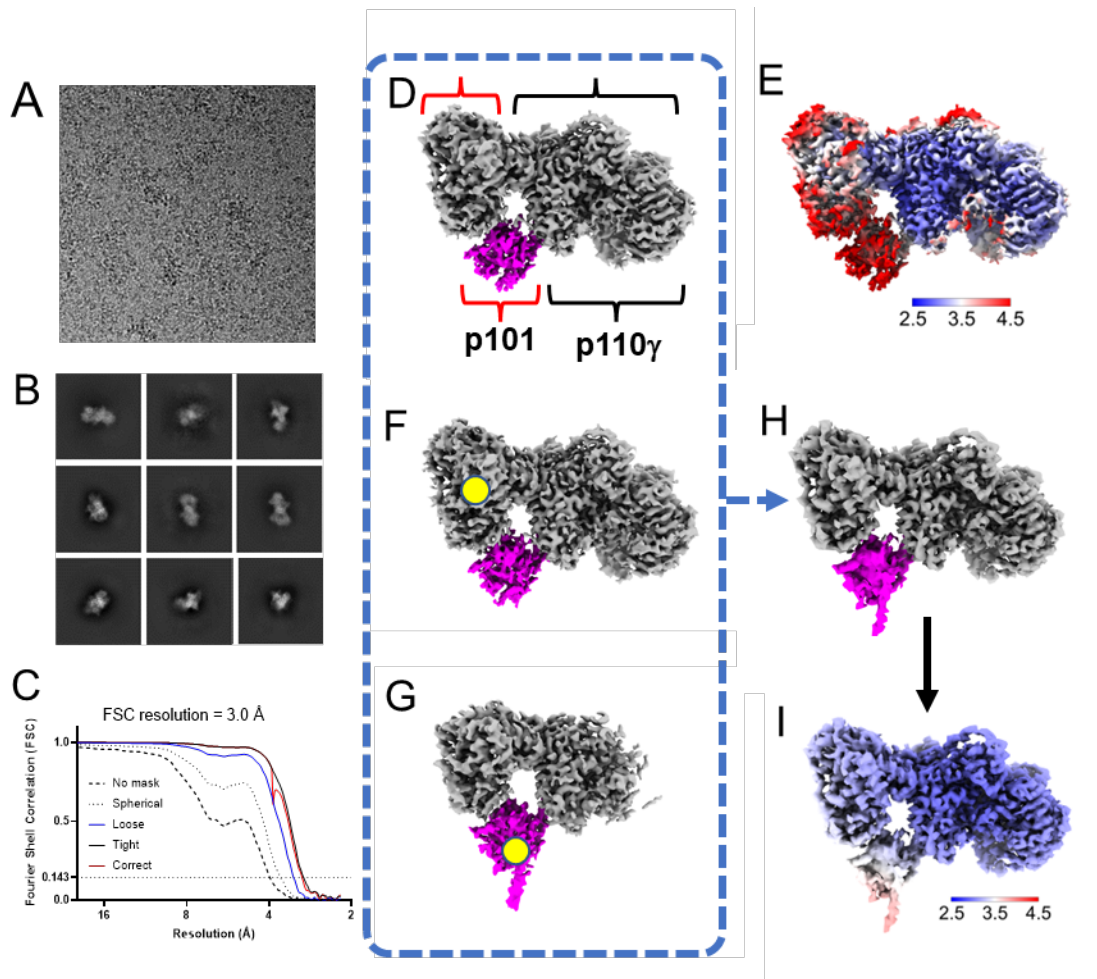

**Extended Data Figure 7. Cryo-EM reconstruction of PI3K $\gamma$ .** (A) Representative micrograph. (B) Representative 2D class averages (box size = 320 pixels where 1 pixel = 1.08 Å). (C) FSC plot, estimating 3.0 Å resolution using FSC at 0.143. (D) Cryo-EM reconstruction. In total, 269,357 particles were used for 3D map reconstruction. Map regions belonging to p110 $\gamma$  and p101 are roughly indicated by the black and red brackets. The CTD of p101 is colored magenta. (E) Local resolution estimation of the PI3K $\gamma$  cryo-EM map from (D). The overall resolution in most regions of p110 $\gamma$  is 2.5-3 Å with well-defined side chains, whereas the overall resolution of p101 is greater than 3.5 Å. (F) Local refinement of PI3K $\gamma$  focused on the p101 NTD. The yellow circle indicates the fulcrum point used for local refinement. (G) Local refinement of PI3K $\gamma$  focused on the p101 C-terminal domain. The yellow circle indicates the fulcrum point used for local refinement. (H) Composite map generated from the three maps shown in panels (D), (F), and (G). (I) Local resolution estimation of the composite PI3K $\gamma$  cryo-EM map from (H). The overall resolution in most regions is 2.5-3 Å, whereas the p101 C-terminal domain has an improved resolution at 3-4 Å.



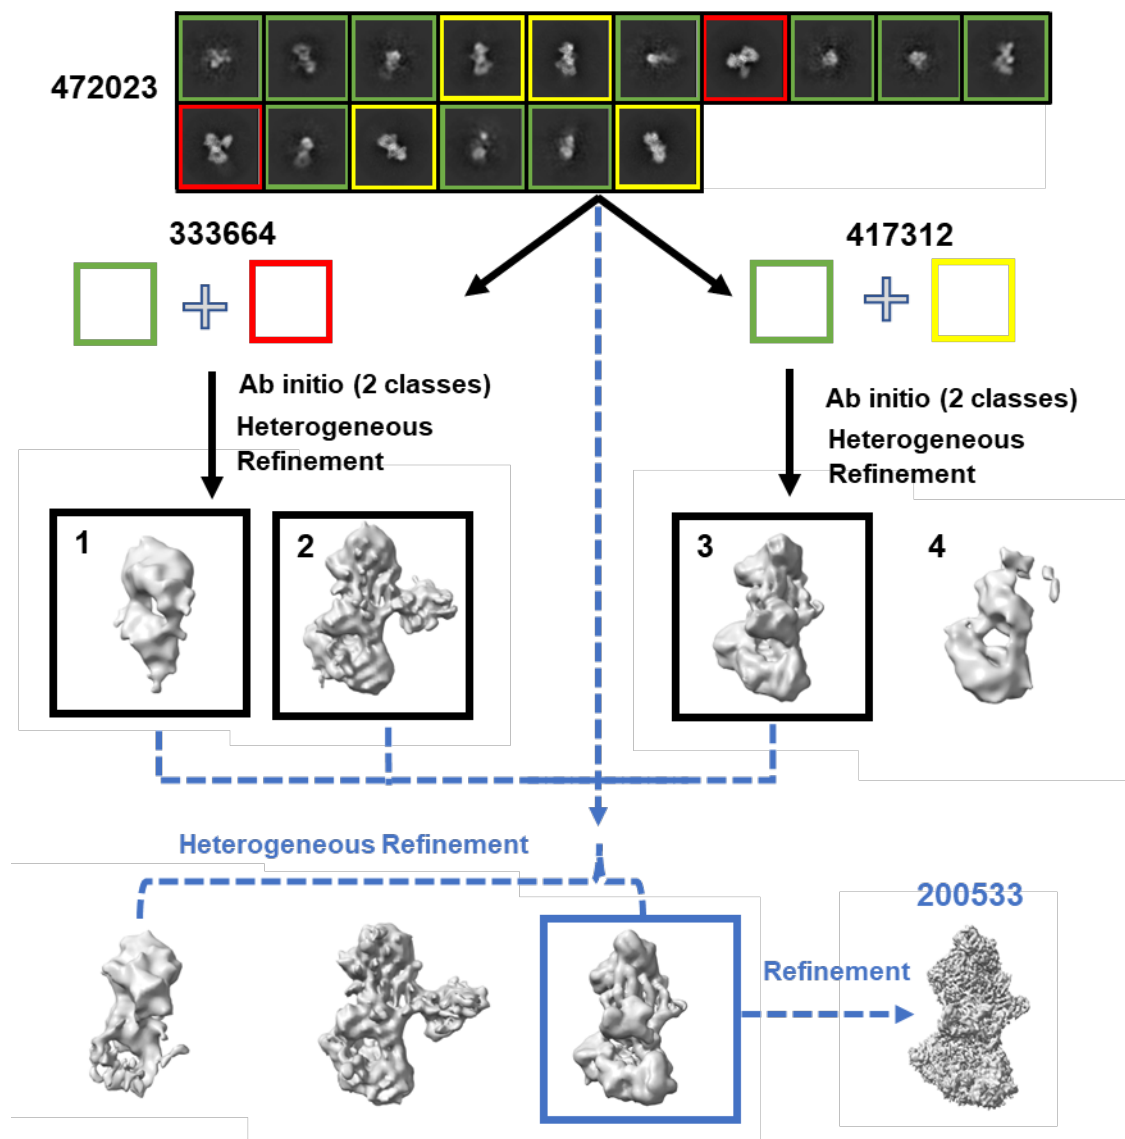

**Extended Data Figure 8. Cryo-EM data processing of PI3K $\gamma$ -ATP derived from an un-tilted dataset of PI3K $\gamma$  supplemented with G $\beta\gamma$  and ATP.** We collected 3936 frames for the PI3K $\gamma$  sample supplemented with G $\beta\gamma$  and ATP and processed the data in CryoSPARC, resulting in 472,023 particles after several rounds of 2D classification. The 2D classes showing distinct G $\beta\gamma$  density are indicated by red boxes. The 2D classes showing no G $\beta\gamma$  density are indicated by yellow boxes. The classes in green boxes are undetermined. We generated 2 *ab initio* maps using the particles from the “red” and “green” 2D classes, followed by heterogeneous refinement in CryoSPARC, resulting in a “junk particle” and “G $\beta\gamma$ -bound PI3K $\gamma$ ” cryo-EM maps. In parallel, we processed the particles from the “yellow” and “green” 2D classes using the same strategy, resulting in a “PI3K $\gamma$  alone” and another “junk particle” cryo-EM map. We then used the 3 maps (1: junk-particle, 2:PI3K $\gamma$ -G $\beta\gamma$ , and 3:PI3K $\gamma$  alone) for sorting all particles using heterogeneous refinement and did homogeneous and local refinements for the “PI3K $\gamma$  alone” data, resulting in a 3.3 Å cryo-EM reconstruction of PI3K $\gamma$ -ATP (**Extended Data Fig. 3E**).

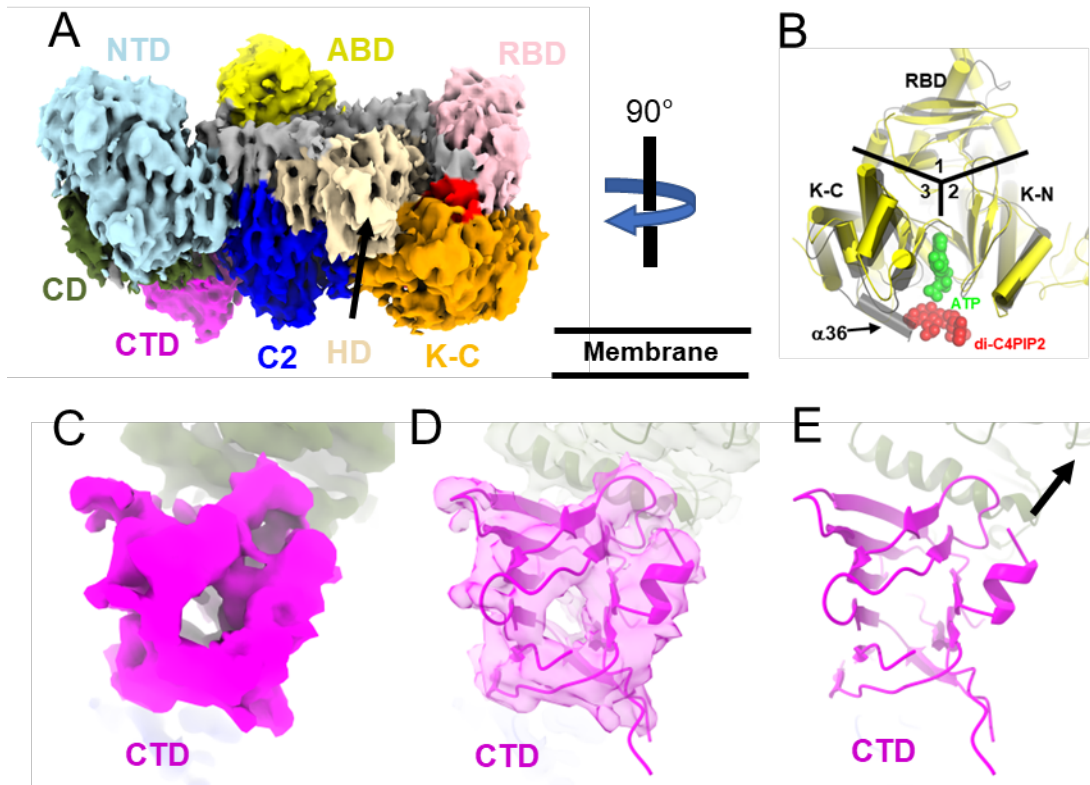

**Extended Data Figure 9. Cryo-EM reconstruction of PI3K $\gamma$ ·ATP.** (A) Cryo-EM map of PI3K $\gamma$ ·ATP. Domains are colored as in Fig 1A. (B) Superimposition of PI3K $\alpha$ ·diC4-PIP<sub>2</sub> (PDB entry 4OVV, in yellow) with PI3K $\gamma$ ·ATP (in black) shows a steric clash between the PIP<sub>2</sub> substrate and  $\alpha$ 36. Molecules, diC4-PIP<sub>2</sub> and ATP in PI3K $\gamma$ ·ATP are shown as spheres colored green and red, respectively. The RBD, K-N, and K-C domains are located in areas 1, 2, and 3, respectively. (C-E) Close up view of the p101 CTD. In (E),  $\alpha$ 18 (residues 695-701) is indicated by a black arrow in the direction from its N- to C-terminal ends.

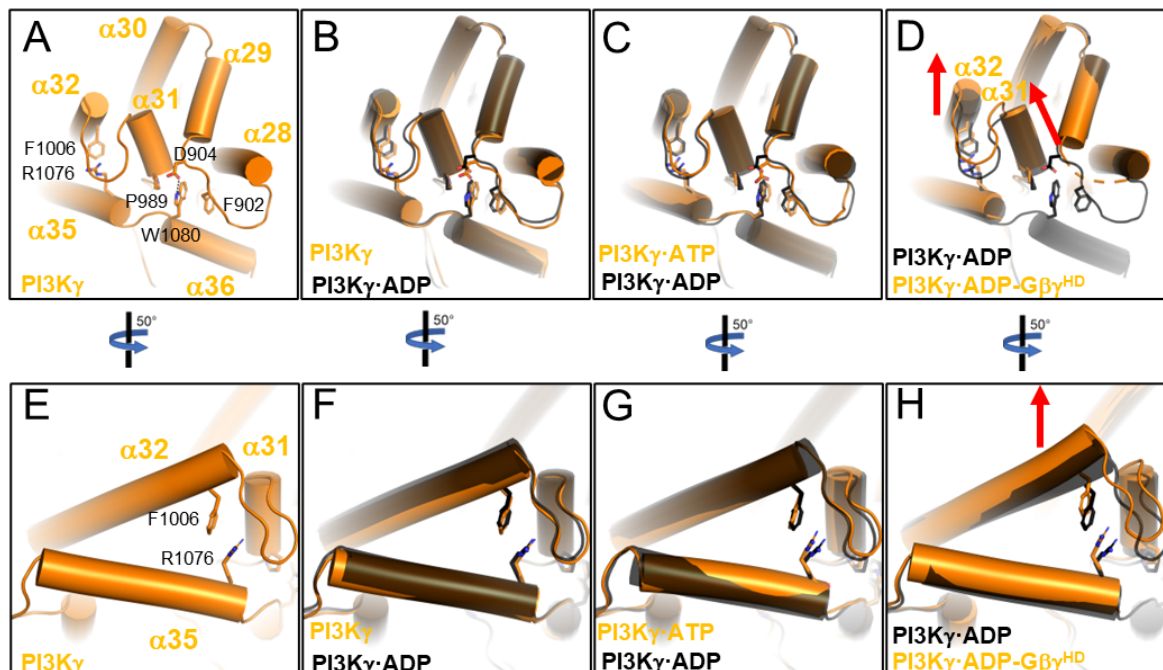

**Extended Data Figure 10. Comparison of the kinase domain C-lobe in PI3K $\gamma$ , PI3K $\gamma$ -ADP, PI3K $\gamma$ -ATP, and PI3K $\gamma$ -ADP-G $\beta\gamma$ <sup>HD</sup> (A-D)** The kinase domain C-lobe in various PI3K $\gamma$  structures. In (A), the tryptophan lock, W1080, and the interacting residues F902, D904, and P989 are shown with stick side chains. (E-H) A close up images of  $\alpha$ 32 and  $\alpha$ 35 and residues Phe1006 and Arg1076, which form a  $\pi$ -stacking interaction in less activated states.

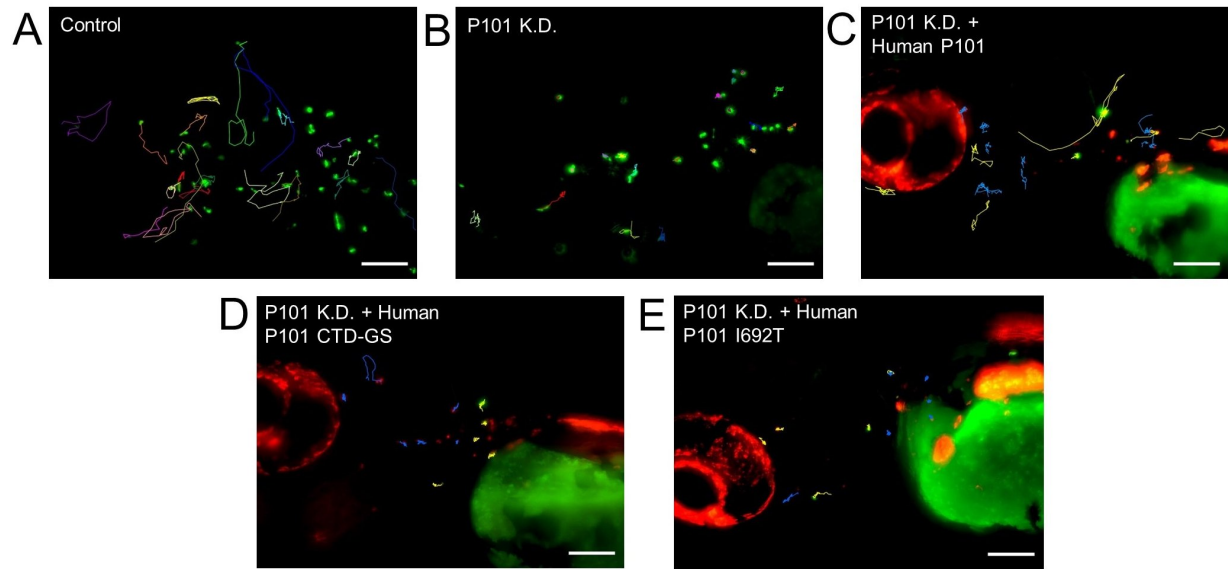

**Extended Data Figure 11. Neutrophil migration tracking. (A-E)** Neutrophil migration imaging in a zebrafish embryo 3 days post-fertilization. **(A-B)** Representative images of neutrophil tracks under control (PBS) or P101 knockdown (MO) background. **(C-E)** Representative images of neutrophils expressing human P101 **(C)**, mutant human P101 CTD-GS **(D)**, or mutant human P101 I690T **(E)** indicated by yellow tracks under P101 knockdown background (blue tracks). Scale bar (white): 100  $\mu$ m.

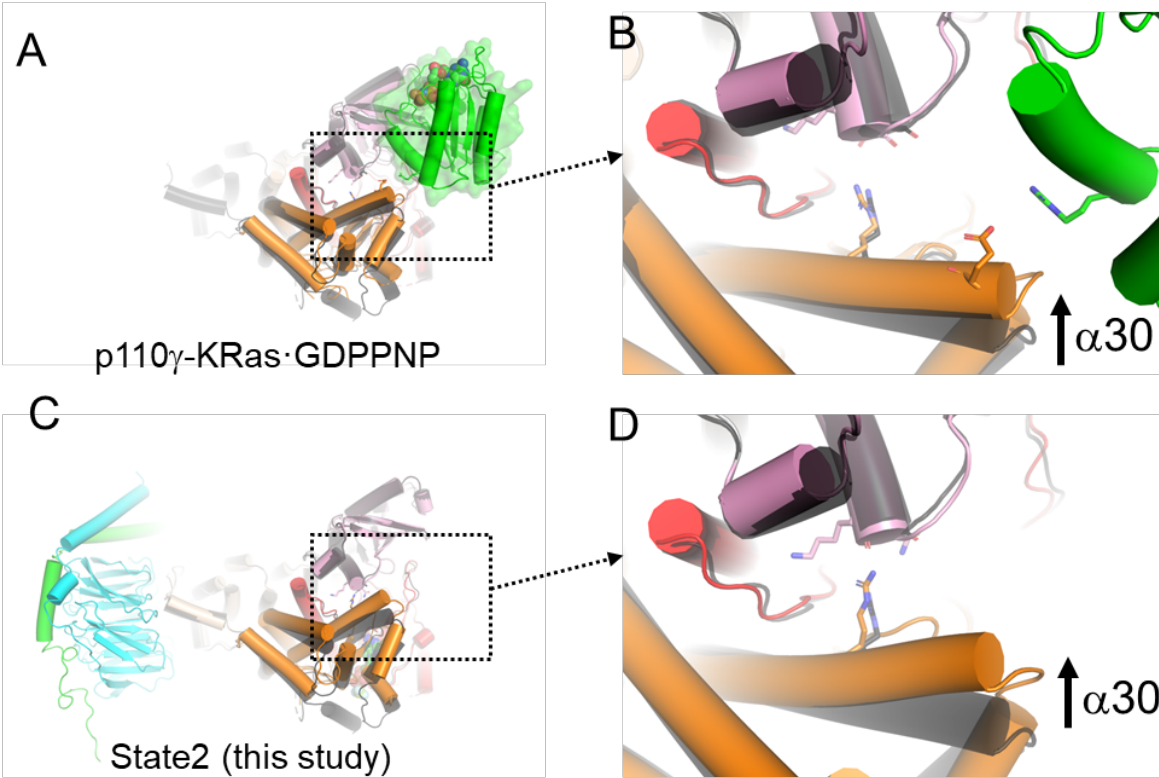

**Extended Data Figure 12. G $\beta$  $\gamma$ - and KRas-mediated conformational changes in PI3K $\gamma$  are similar. (A)** Superposition of PI3K $\gamma$  (black) with the crystal structure of the p110 $\gamma$  subunit complexed with activated K-Ras (p110 $\gamma$ -K-Ras·GDPPNP, PDB entry 1HE8). Activated K-Ras bound with GDPPNP is shown in green cartoon representation surrounded by a green transparent surface. **(B)** A close-up view of the kinase domain N-lobe. A shift of  $\alpha$ 30 is indicated. **(C)** Superposition of PI3K $\gamma$  (black) with State 2 of PI3K $\gamma$ -ADP-G $\beta$  $\gamma$ <sup>HD</sup>-G $\beta$  $\gamma$ <sup>CTD</sup>. **(D)** A close-up view in the kinase domain N-lobe. A shift of  $\alpha$ 30 is indicated.

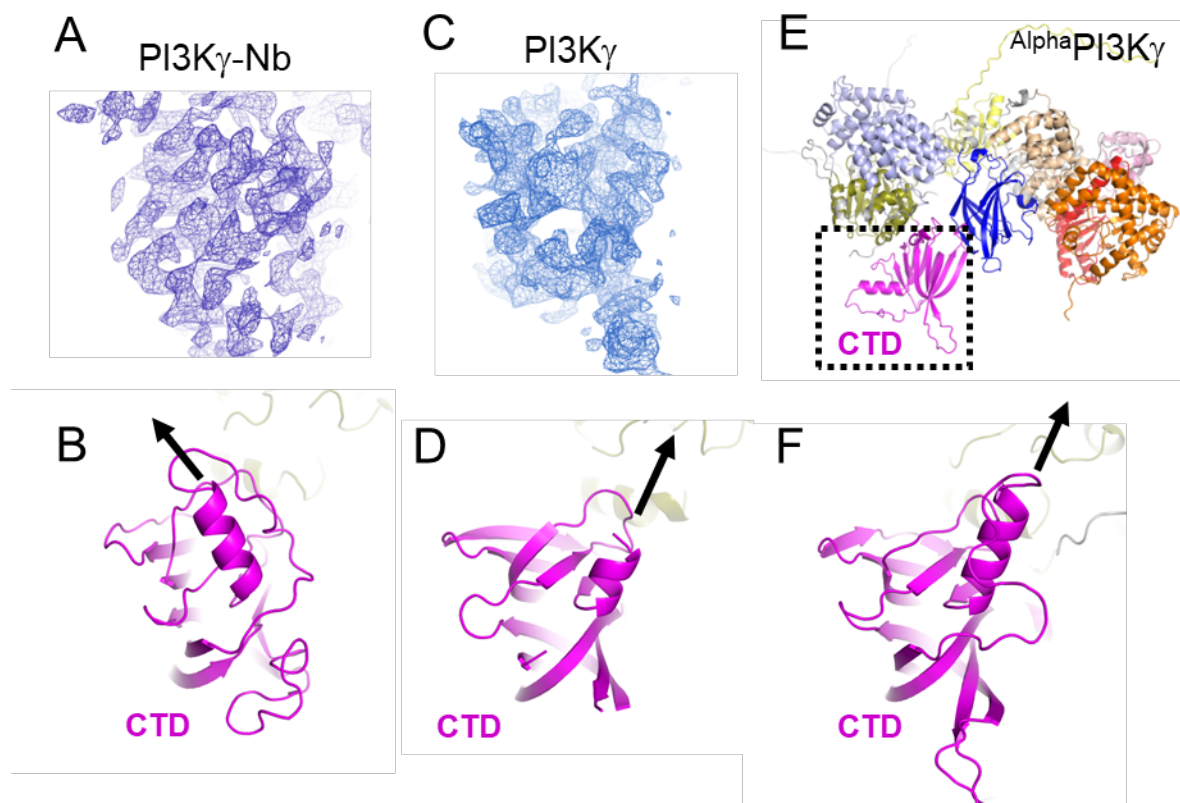

**Extended Data Figure 13. Comparison of maps and models of PI3K $\gamma$ , PI3K $\gamma$ -Nb, and AlphaFold predicted PI3K $\gamma$  ( $^{\text{Alpha}}$ PI3K $\gamma$ ) around the p101 CTD. (A) Cryo-EM map of  $^{\text{HP}}$ PI3K $\gamma$ -Nb (PDB entry 7MEZ) p101 CTD. (B) Atomic model thereof. (C) Cryo-EM map of PI3K $\gamma$  (PDB entry 8SO9) p101 CTD. (D) Atomic model thereof. (E) Cartoon representation of  $^{\text{Alpha}}$ PI3K $\gamma$  with domain colored as described in Fig 1A. (F) A zoom-in view of the p101 C-terminal domain in the same orientation as that in (A)-(D). In (B), (D), and (F), the helix orientation of  $\alpha$ 18 of PI3K $\gamma$  (residues 695-701) is indicated by black arrows pointing from their N- to C- terminal ends.**

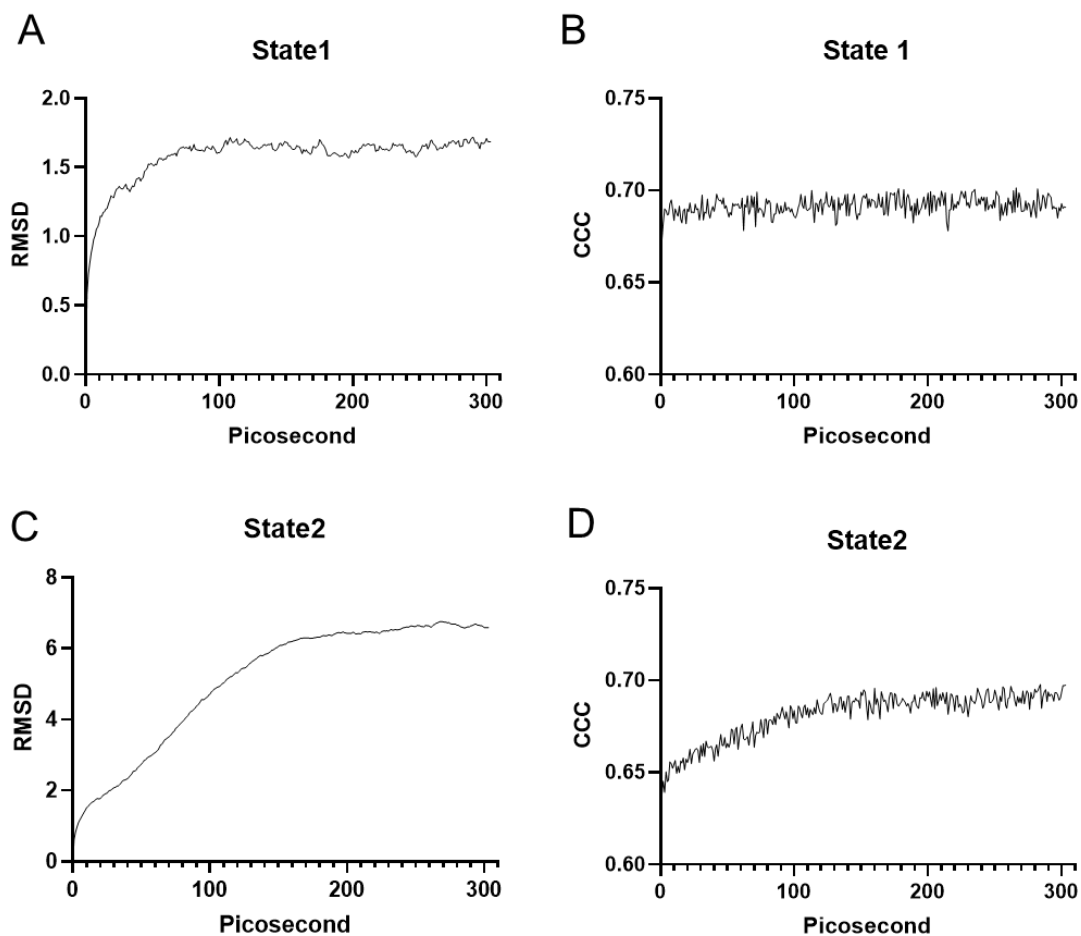

**Extended Data Figure 14. Molecular dynamics flexible fitting for the two conformational states of PI3K $\gamma$ -ADP-G $\beta\gamma$ <sup>HD</sup>-G $\beta\gamma$ <sup>CTD</sup>. (A-B)** Calculated C $\alpha$  RMSD and the cross-correlation coefficient (CCC) of the simulated structures to the starting model for State 1. **(C-D)** Calculated C $\alpha$  RMSD and the CCC of the simulated structures to the starting model for State 2. See Methods.

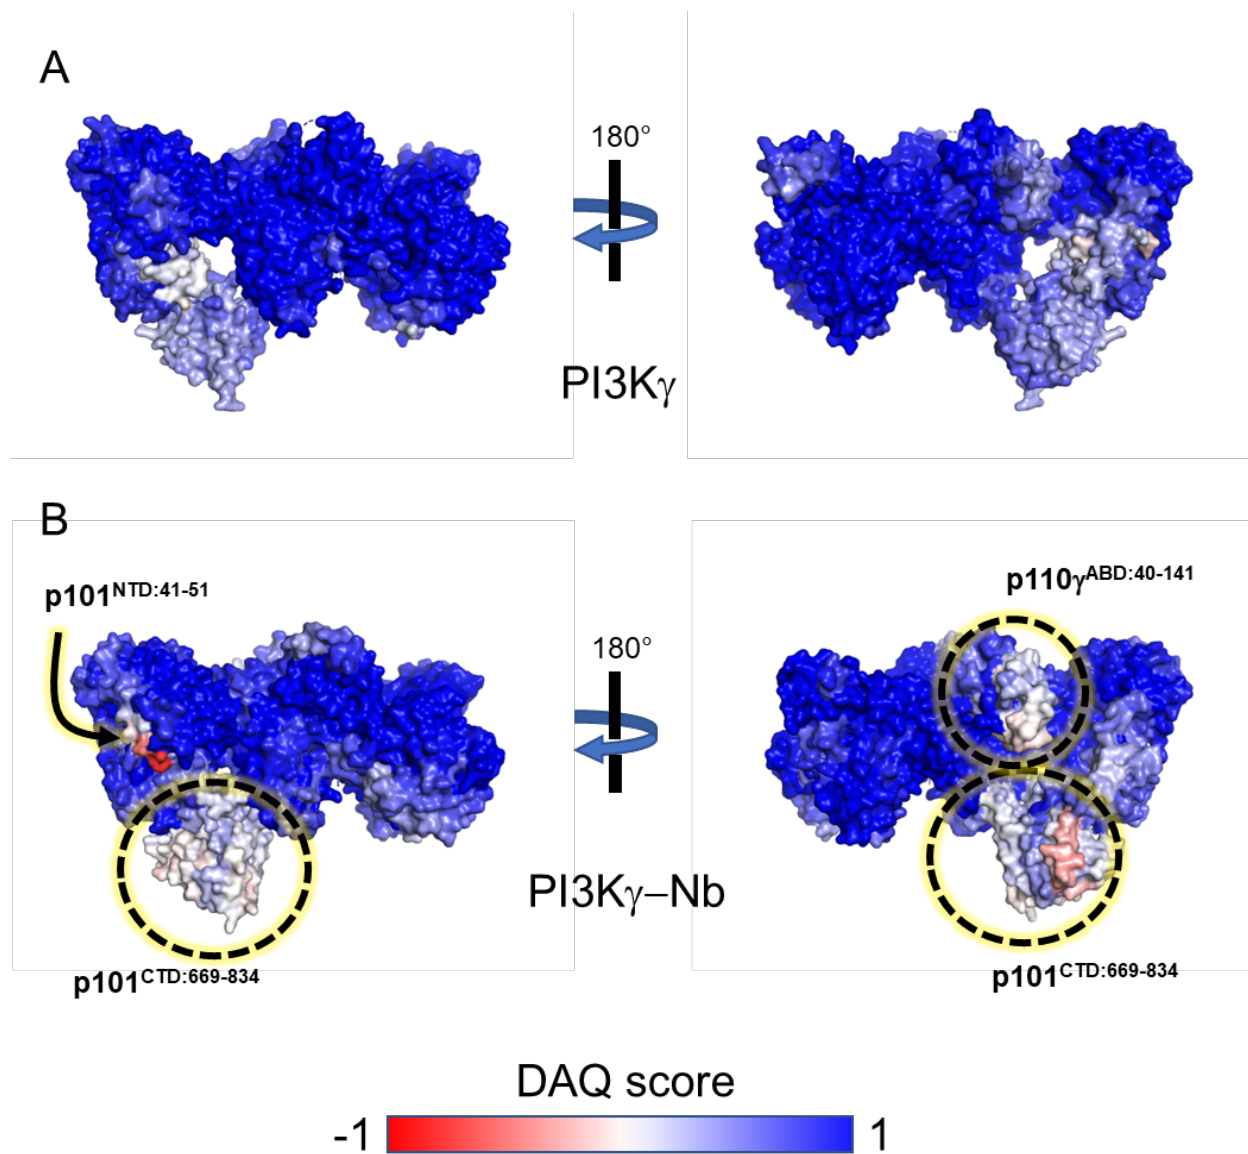

**Extended Data Figure 15. Residue-wise local quality estimation (DAQ) of PI3K $\gamma$  and PI3K $\gamma$ -Nb.** (A) The DAQ evaluation of the PI3K $\gamma$  model (PDB entry 8SO9) to the corresponding cryo-EM map in this study. (B) DAQ evaluation of the PI3K $\gamma$ -Nb model (PDB entry 7MEZ) to its corresponding cryo-EM map (EMDB entry EMD-23808). Regions with poor model/map agreement (DAQ < 0) are labeled and indicated by an arrow and dashed circles.



## Extended Data Table 1 Structure Statistics

|                                                        | PI3K $\gamma$      | PI3K $\gamma$ -ATP | PI3K $\gamma$ -ADP  | PI3K $\gamma$ -ADP-G $\beta\gamma$ <sup>HD</sup> | State1 of<br>PI3K $\gamma$ -ADP-<br>G $\beta\gamma$ <sup>HD</sup> -G $\beta\gamma$ <sup>CTD</sup> | State2 of<br>PI3K $\gamma$ -ADP-<br>G $\beta\gamma$ <sup>HD</sup> -G $\beta\gamma$ <sup>CTD</sup> |
|--------------------------------------------------------|--------------------|--------------------|---------------------|--------------------------------------------------|---------------------------------------------------------------------------------------------------|---------------------------------------------------------------------------------------------------|
| <b>PDB</b>                                             | 8SO9               | 8SOA               | 8SOB                | 8SOC                                             | 8SOD                                                                                              | 8SOE                                                                                              |
| <b>EMDB</b>                                            | EMD-40650          | EMD-40651          | EMD-40652           | EMD-40653                                        | EMD-40654                                                                                         | EMD-40655                                                                                         |
| <b>Data collection and processing</b>                  |                    |                    |                     |                                                  |                                                                                                   |                                                                                                   |
| <b>Magnification</b>                                   | 81000              | 81000              | 81000               | 81000                                            | 81000                                                                                             | 81000                                                                                             |
| <b>Voltage (kV)</b>                                    | 300                | 300                | 300                 | 300                                              | 300                                                                                               | 300                                                                                               |
| <b>Electron exposure (e<sup>-</sup>/Å<sup>2</sup>)</b> | 56                 |                    |                     |                                                  |                                                                                                   |                                                                                                   |
| <b>Defocus range (μm)</b>                              | -0.5~-2.2 mm       | -0.5~-2.2 mm       | -0.5~-2.2 mm        | -0.5~-2.2 mm                                     | -0.5~-2.2 mm                                                                                      | -0.5~-2.2 mm                                                                                      |
| <b>Pixel size (Å)</b>                                  | 0.54               | 0.54               | 0.54                | 0.54                                             | 0.54                                                                                              | 0.54                                                                                              |
| <b>Symmetry imposed</b>                                | C1                 | C1                 | C1                  | C1                                               | C1                                                                                                | C1                                                                                                |
| <b>Initial particle images (no.)</b>                   |                    |                    |                     |                                                  |                                                                                                   |                                                                                                   |
| <b>Final particle images (no.)</b>                     | 269,357            | 200,533            | 92,933              | 183,298                                          | 167,954                                                                                           | 181,939                                                                                           |
| <b>Map resolution (Å)</b><br>(FSC threshold=0.143)     | 3.0                | 3.3                | 3.9                 | 3.6                                              | 3.4                                                                                               | 3.6                                                                                               |
| <b>Refinement</b>                                      |                    |                    |                     |                                                  |                                                                                                   |                                                                                                   |
| <b>Map sharpening B factor (Å<sup>2</sup>)</b>         | 122.0              | 118.2              | 145.2               | 135.1                                            | 134.1                                                                                             | 136.5                                                                                             |
| <b>Model composition</b>                               | 12250 / 1523       | 11975 / 1481       | 12163 / 1507        | 14872 / 1860                                     | 18050 / 2271                                                                                      | 17789 / 2238                                                                                      |
| <b>Non-hydrogen atoms</b>                              |                    |                    |                     |                                                  |                                                                                                   |                                                                                                   |
| <b>Protein residues</b>                                |                    |                    |                     |                                                  |                                                                                                   |                                                                                                   |
| <b>B factors (Å<sup>2</sup>)</b>                       | 172.6 / ---        | 84.1 / 67.74       | 148.5 / 141.0       | 152.1 / 149.7                                    | 163.5 / 137.5                                                                                     | 194.7 / 160.0                                                                                     |
| <b>Protein</b>                                         |                    |                    |                     |                                                  |                                                                                                   |                                                                                                   |
| <b>Ligand</b>                                          |                    |                    |                     |                                                  |                                                                                                   |                                                                                                   |
| <b>R.m.s. deviations</b>                               | 0.004 / 0.6        | 0.004 / 0.571      | 0.005 / 0.587       | 0.004 / 0.608                                    | 0.004 / 0.701                                                                                     | 0.003 / 0.670                                                                                     |
| <b>Bond lengths (Å)</b>                                |                    |                    |                     |                                                  |                                                                                                   |                                                                                                   |
| <b>Bond angles (°)</b>                                 |                    |                    |                     |                                                  |                                                                                                   |                                                                                                   |
| <b>Validation</b>                                      | 1.77 / 2.52 / 2.79 | 1.73 / 3.37 / 2.94 | 2.07 / 5.37 / 2.89  | 1.90 / 4.91 / 2.26                               | 2.32 / 7.69 / 3.33                                                                                | 2.13 / 5.24 / 3.53                                                                                |
| <b>MolProbity score/</b>                               |                    |                    |                     |                                                  |                                                                                                   |                                                                                                   |
| <b>Clashscore/</b>                                     |                    |                    |                     |                                                  |                                                                                                   |                                                                                                   |
| <b>Poor rotamers (%)</b>                               |                    |                    |                     |                                                  |                                                                                                   |                                                                                                   |
| <b>Ramachandran plot</b>                               | 94.1 / 5.7 / 0.2   | 96.33 / 3.6 / 0.07 | 93.29 / 6.64 / 0.07 | 94.44 / 5.45 / 0.11                              | 91.62 / 8.34 / 0.04                                                                               | 93.28 / 6.68 / 0.04                                                                               |
| <b>Favored (%)</b>                                     |                    |                    |                     |                                                  |                                                                                                   |                                                                                                   |
| <b>Allowed (%)</b>                                     |                    |                    |                     |                                                  |                                                                                                   |                                                                                                   |
| <b>Disallowed (%)</b>                                  |                    |                    |                     |                                                  |                                                                                                   |                                                                                                   |

**Extended Data Table 2. Primers for mutagenesis of *Sus scrofa* PI3K $\gamma$** 

| Primer                         | Forward (F)<br>or Reverse<br>(R) | Sequence                                                    |
|--------------------------------|----------------------------------|-------------------------------------------------------------|
| p110 $\gamma$                  | F                                | CCCGGAGAATTCATGCATCACCATCACCATCACGAGCTGGAGAACTATGAACAGC     |
| p110 $\gamma$                  | R                                | CCCAGGTCTAGATTATGCGGAATGCTTCTCCCCTTGTTTGATGCC               |
| p101                           | F                                | AGCCATGGTGCTAGCATGCAGCCAGGGGCCACGACGTGCACGGAGGACCGC         |
| p101                           | R                                | TCTCCCGGTACCCTACTTATCGTCGTCATCCTTGTAATCAGAGCC               |
| p110 $\gamma$ <sup>L551A</sup> | F                                | GCCCAATCAGGCACGGAAGCAACTGG                                  |
| p110 $\gamma$ <sup>L551A</sup> | R                                | CCAGTTGCTTCCGTGCCTGATTGGGC                                  |
| p110 $\gamma$ <sup>L564S</sup> | F                                | CACGGATCCGAGCAACCCACTCAC                                    |
| p110 $\gamma$ <sup>L564S</sup> | R                                | GTGAGTGGGTTGCTCGGATCCGTG                                    |
| p101 <sup>I689T</sup>          | F                                | GGAGATCTTCACCCACTCCCTGG                                     |
| p101 <sup>I689T</sup>          | R                                | CCAGGGAGTGGGTGAAGATCTCC                                     |
| p101 <sup>CTD-GS</sup>         | F                                | CAAGGCTTCGGGTCTGGCAGCGGCAGCCTGGGCATCGATGGTGACCGGGAGGCCGTCC  |
| p101 <sup>CTD-GS</sup>         | R                                | GGACGGCCTCCCGGTCACCATCGATGCCAGGCTGCCGCTGCCAGGACCCGAAGCCTTG  |
| p101 <sup>CTD-GSS</sup>        | F                                | CAAGGCTTCGGGTCTGGCAGCGGCAGCAGTGGCATCGATGGTGACCGGGAGGCCGTCC  |
| p101 <sup>CTD-GSS</sup>        | R                                | GGACGGCCTCCCGGTCACCATCGATGCCACTGCTGCCGCTGCCAGGACCCGAAGCCTTG |

### Extended Data Table 3. Specific activity of PI3K $\gamma$ variants

| Complex Name | Catalytic Subunit | Regulatory Subunit | Basal Specific Activity (nmol ADP* $\mu$ mol enzyme <sup>-1</sup> *min <sup>-1</sup> ) | Maximum Specific Activity (G $\beta$ $\gamma$ ) (nmol ADP* $\mu$ mol enzyme <sup>-1</sup> *min <sup>-1</sup> ) | Fold Activation | n  |
|--------------|-------------------|--------------------|----------------------------------------------------------------------------------------|----------------------------------------------------------------------------------------------------------------|-----------------|----|
| WT           | p110 $\gamma$     | p101               | 900 $\pm$ 400                                                                          | 9000 $\pm$ 400                                                                                                 | 10              | 8  |
| L551A        | L551A             | p101               | 850 $\pm$ 100                                                                          | 2100 $\pm$ 100                                                                                                 | 2.4             | 14 |
| L564S        | L564S             | p101               | 850 $\pm$ 400                                                                          | 2200 $\pm$ 200                                                                                                 | 2.6             | 8  |
| I689T        | p110 $\gamma$     | I689T              | 730 $\pm$ 200                                                                          | 2100 $\pm$ 300                                                                                                 | 2.9             | 10 |
| CTD-GS       | p110 $\gamma$     | 711GS              | 970 $\pm$ 200                                                                          | 4400 $\pm$ 200                                                                                                 | 4.5             | 8  |
| CTD-GSS      | p110 $\gamma$     | 711GSS             | 1200 $\pm$ 200                                                                         | 4400 $\pm$ 400                                                                                                 | 3.6             | 8  |

\* Enzymatic reactions were conducted at room temperature for 40 minutes, followed by measuring ADP production with ADP-glo. The values of basal and maximum specific activity were derived from curve fitting as shown in Fig 5C-F (see methods).

**Extended Data Movie 1. Tracking movies of migrating neutrophils in the head mesenchyme with p101 knockdown.** The video shows the motility of neutrophils in 3 dpf (days post fertilization) *Tg(IyzC:RFP)* zebrafish larvae injected with buffer or p101 morpholino. Videos were recorded for 30 min at 1 min intervals.

Representative videos from n = 3 independent experiments with four fish in each group are shown. Scale bar: 100  $\mu$ m.

**Extended Data Movie 2. Tracking movies of migrating neutrophils in the head mesenchyme re-expressing p101 wild type or mutations in the p101 knockdown background.** The videos show the motility of neutrophils in 3 dpf *Tg(lyzC:RFP)* zebrafish larvae injected with buffer or p101 morpholino, then injected with Tol2-lyzC-human p101, mutant human p101 I692T, or p101 CTD-GS plasmids for transient re-expression. Videos were recorded for 30 min with 1 min intervals. Yellow tracks indicate neutrophils with transient p101 expression. Blue tracks indicate neutrophils with p101 knockdown in the same fish. Representative videos from n = 3 independent experiments with four fish in each group are shown. Scale bar: 100  $\mu$ m.
